# Supplementary material for: Slow magnetic relaxation in mononuclear complexes of Tb, Dy, Ho and Er with the pentadentate (N3O2) Schiff-base dapsc ligand
Source: Royal Society of Chemistry journal article supplement (doi:10.1039/c8nj01928b), 2018-01-01
Supplement: c8nj01928b1.pdf [file c8nj01928b1.pdf]

Electronic Supplementary Materials for New J. Chem.  
This journal is © The Royal Society of Chemistry 2018

## Slow magnetic relaxation in mononuclear complexes of Tb, Dy, Ho and Er with the pentadentate ( $N_3O_2$ ) Schiff-base dapsc ligand.

Valentina D. Sasnovskaya,<sup>a</sup> Vyacheslav A. Kopotkov,<sup>\*a</sup> Anna V. Kazakova,<sup>a</sup> Artem D. Talantsev,<sup>a</sup> Roman B. Morgunov,<sup>a</sup> Sergey V. Simonov,<sup>b</sup> Leokadiya V. Zorina,<sup>b</sup> Vladimir S. Mironov,<sup>\*c</sup> Eduard B. Yagubskii<sup>\*a</sup>

<sup>a</sup> Institute of Problems of Chemical Physics of Russian Academy of Sciences, Semenov's av., 1, Chernogolovka, MD, Russian Federation E-mail: slavaoven@mail.ru, yagubski@icp.ac.ru;

<sup>b</sup> Institute of Solid State Physics of Russian Academy of Sciences, Academician Ossipyan str., 2 Chernogolovka, MD, Russian Federation. E-mail: zorina@issp.ac.ru;

<sup>c</sup> Shubnikov Institute of Crystallography of Federal Scientific Research Centre "Crystallography and Photonics" of Russian Academy of Sciences, Lininskii av. 59, Moscow, Russian Federation E-mail: mirsa@list.ru

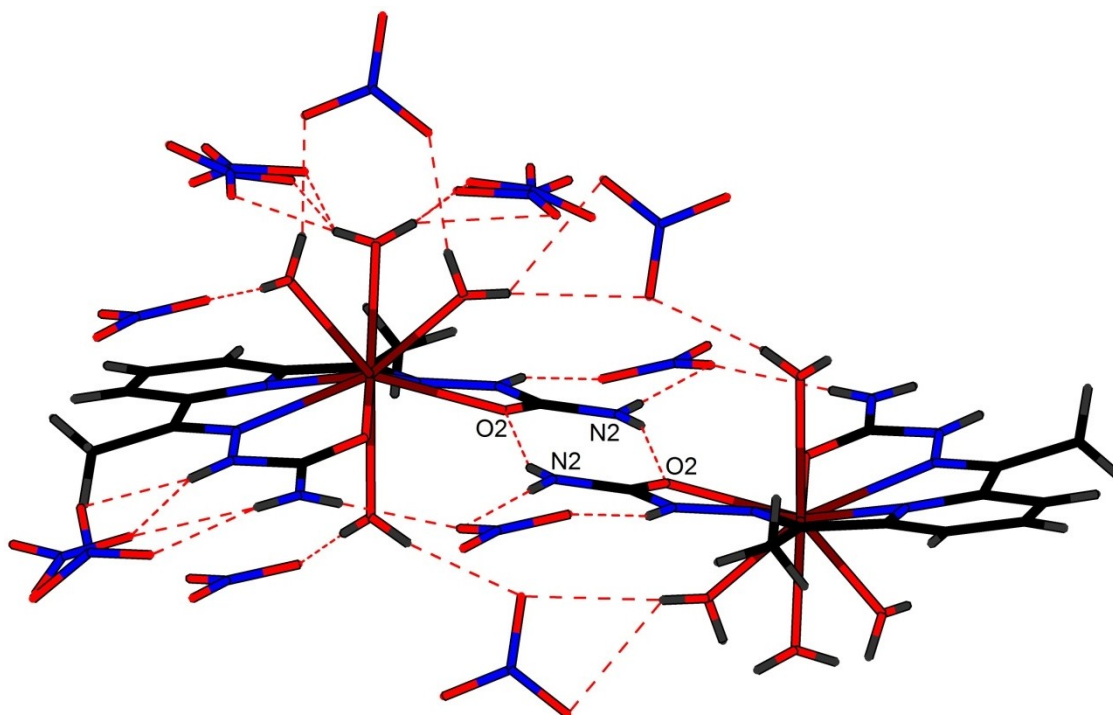

Figure S1. Hydrogen bonding in 1-Tb.

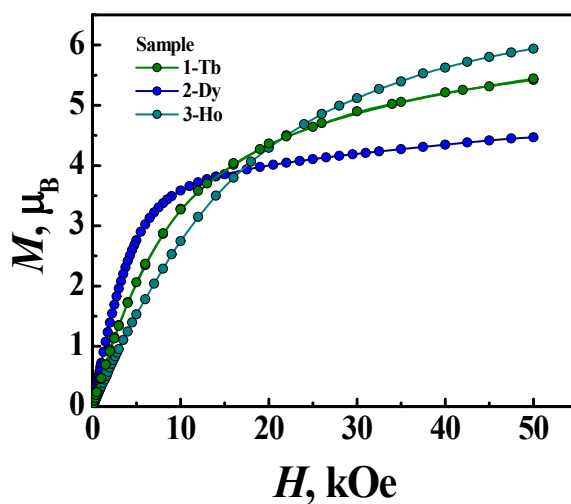

Figure S2.  $M$  vs  $H$  for 1-Tb, 2-Dy and 3-Ho complexes.

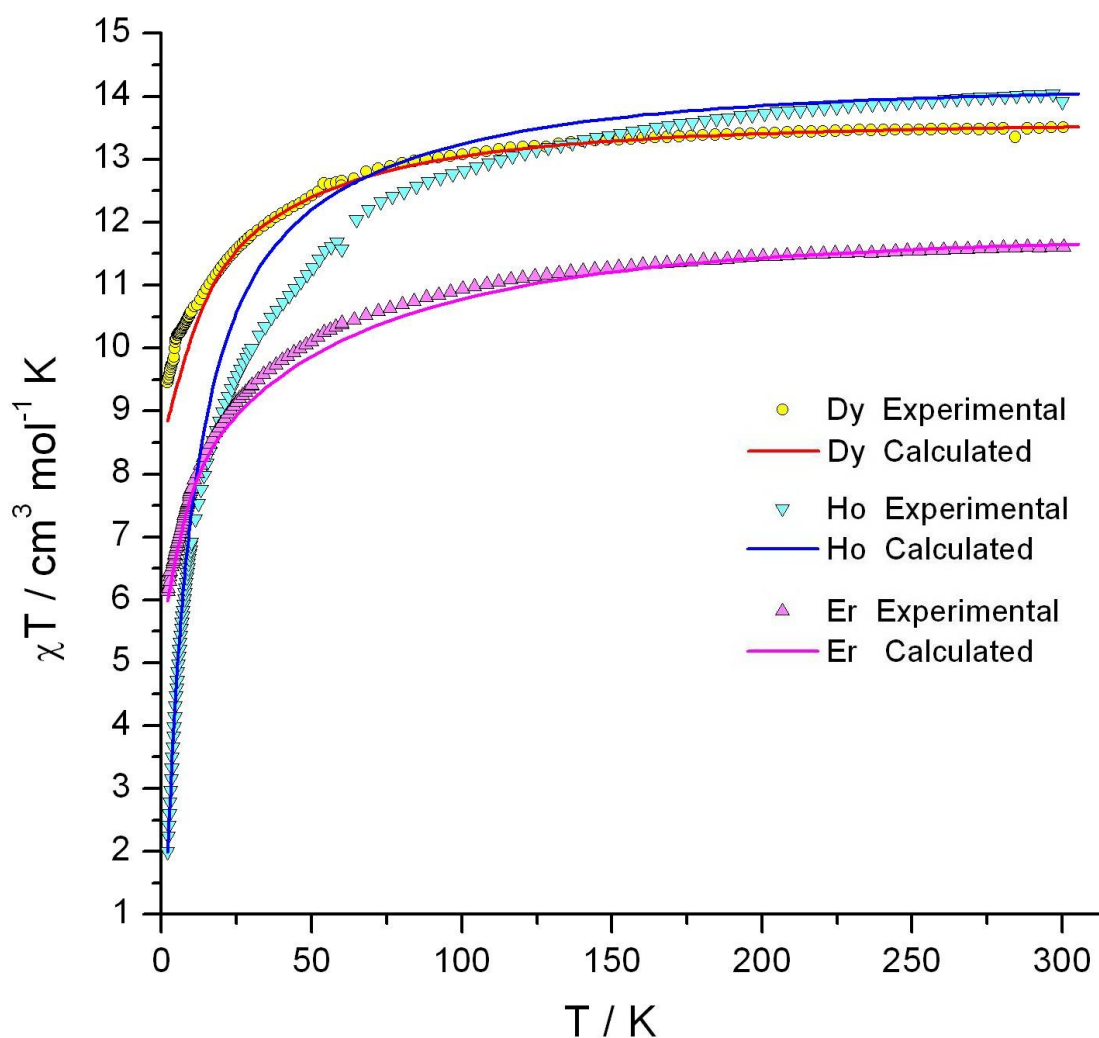

Figure S3. Experimental and calculated temperature variation of the  $\chi_{\text{mol}}T$  product for the  $[\text{Ln}(\text{H}_2\text{dapsc})(\text{H}_2\text{O})_4](\text{NO}_3)_3$  complexes 2-4 obtained with the initial set of intrinsic CF parameters  $b_2 = 1000$ ,  $b_4 = 420$ ,  $b_6 = 270 \text{ cm}^{-1}$  (at  $R_0 = 2.45 \text{ \AA}$ ), for O and N ligand atoms.

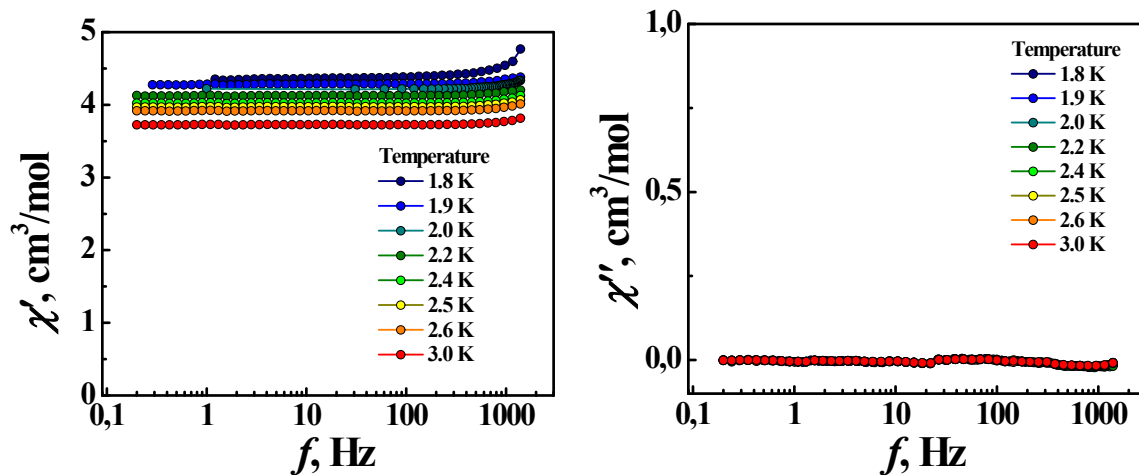

(a)

(b)

**Figure S4.** The frequency dependencies of in-phase  $\chi'$  (a) and out-of-phase  $\chi''$  (b) ac magnetic susceptibility for **1-Tb** at temperatures of 1.8-3.0 K in zero dc field.

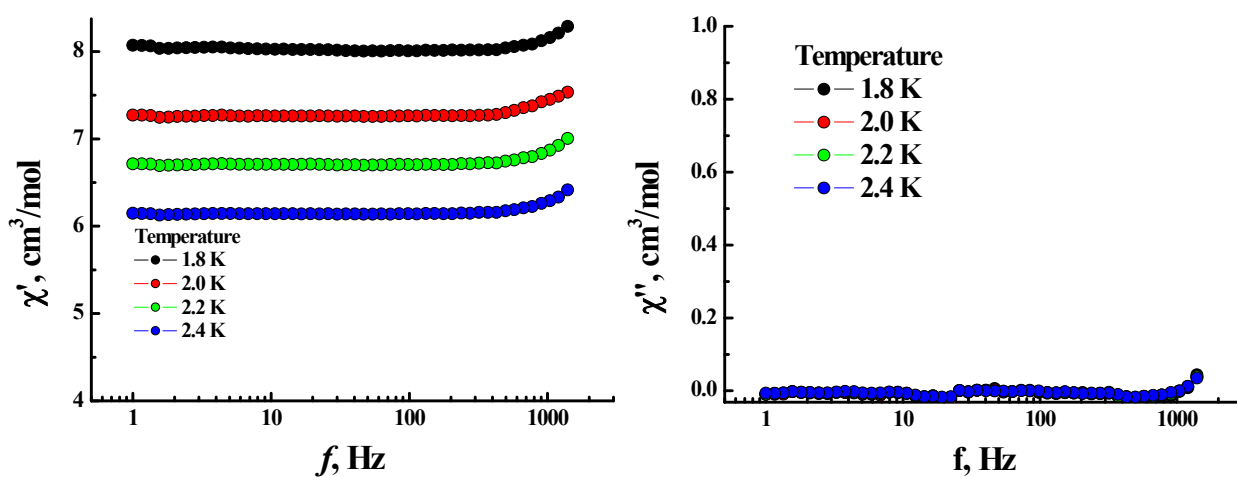

(a)

(b)

**Figure S5.** The frequency dependencies of in-phase  $\chi'$  (a) and out-of-phase  $\chi''$  (b) ac magnetic susceptibility for **2-Dy** at temperatures of 1.8-2.4 K in zero dc field.

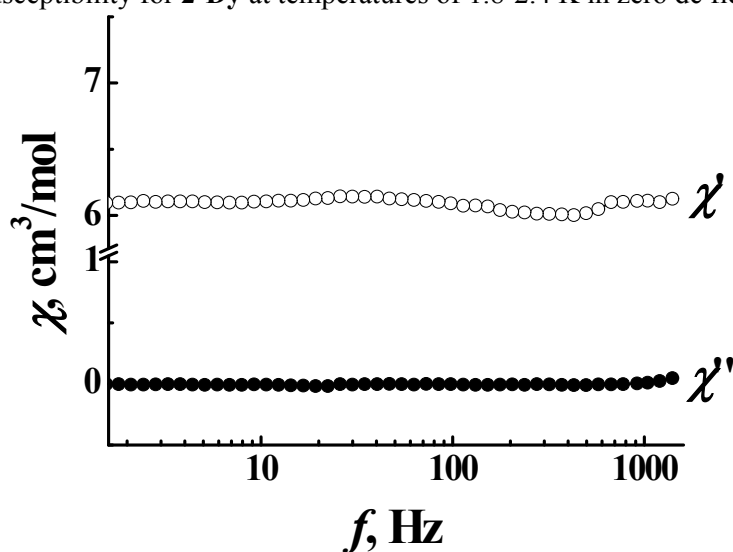

**Figure S6.** The frequency dependencies of in-phase  $\chi'$  and out-of-phase  $\chi''$  ac magnetic susceptibility for **4-Er** at temperatures of 1.8 K in zero dc field.

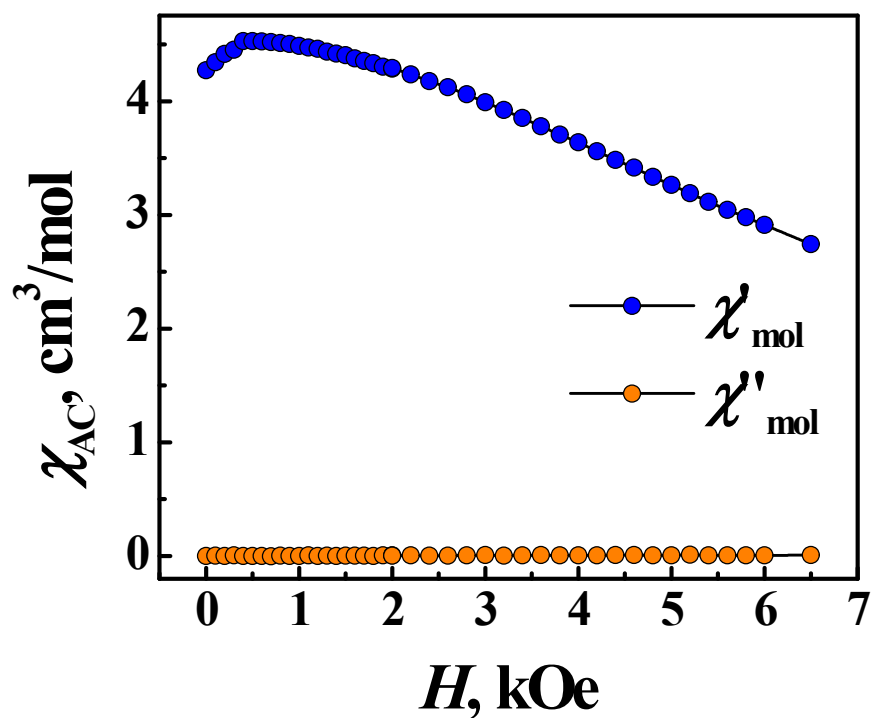

**Figure S7.** *Dc* field dependencies of ac magnetic susceptibility for **1-Tb** at  $T = 1.8$  K and frequency ( $f$ ) of 100 Hz (ac field amplitude of 4 Oe).

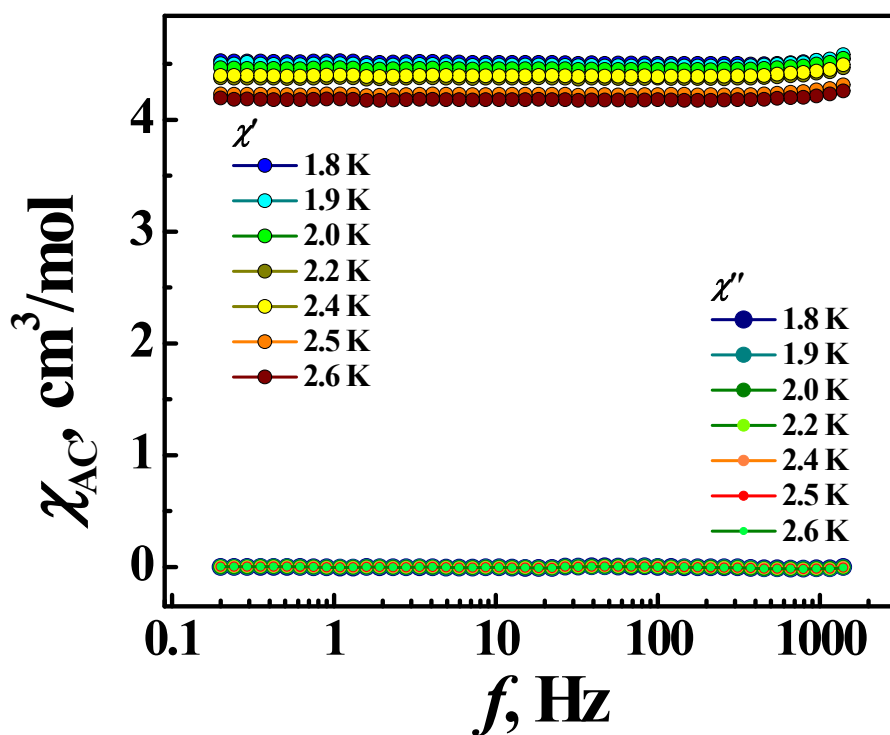

**Figure S8.** The frequency dependencies of in-phase  $\chi'$  and out-of-phase  $\chi''$  ac magnetic susceptibility for **1-Tb** at temperatures of 1.8-2.6 K in dc field of 1000 Oe (ac field amplitude is 4 Oe).

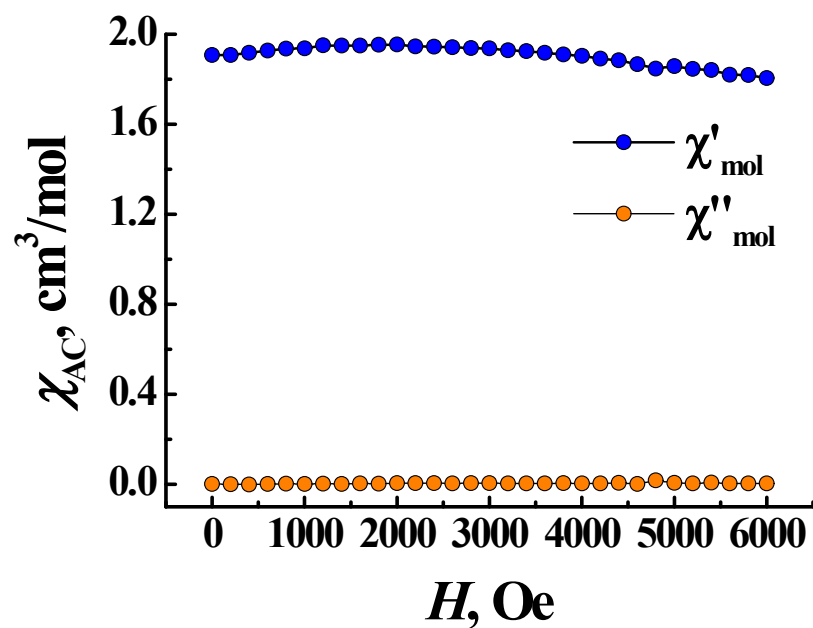

**Figure S9.** Dc field dependencies of ac magnetic susceptibility for **3-Ho** at  $T = 1.8$  K and frequency ( $f$ ) of 100 Hz (ac field amplitude of 4 Oe).

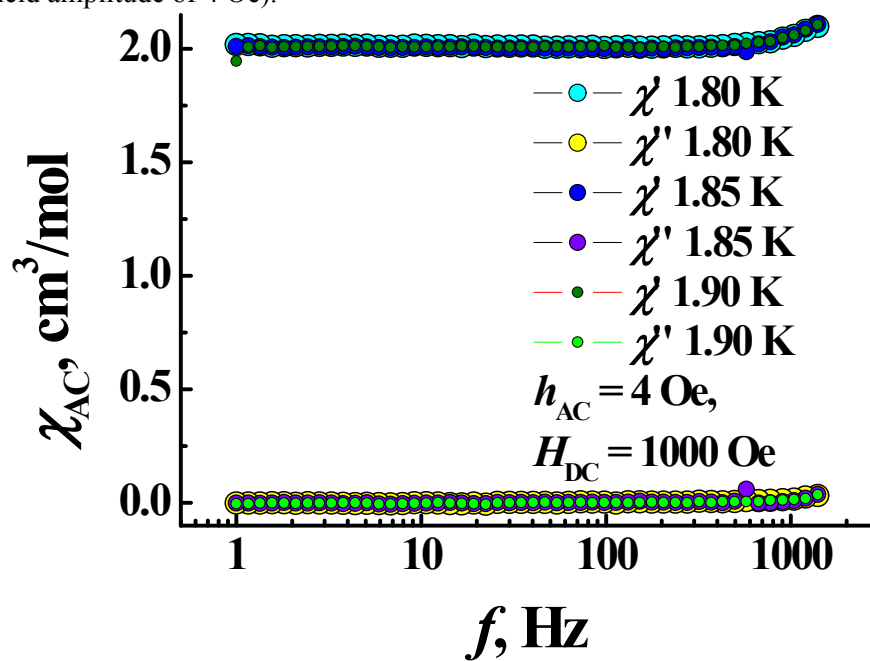

**Figure S10.** The frequency dependencies of in-phase  $\chi'$  and out-of-phase  $\chi''$  ac magnetic susceptibility for **3-Ho** at temperatures of 1.8-1.9 K in dc field of 1000 Oe (ac field amplitude is 4 Oe).

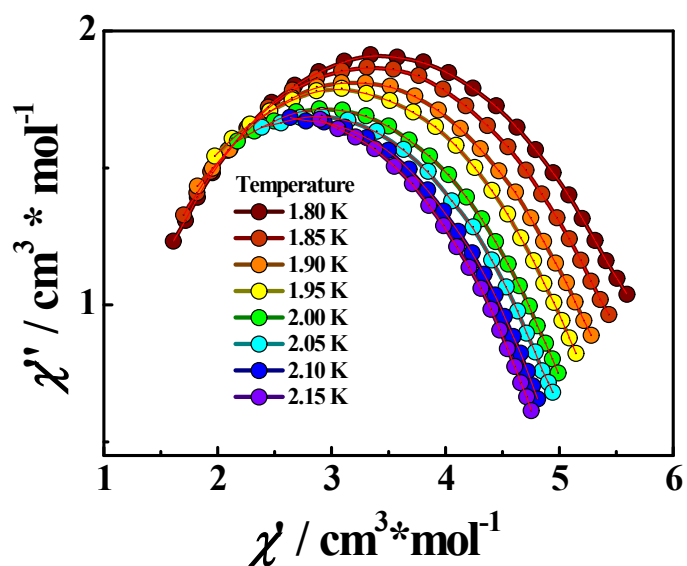

**Figure S11.** High frequency part of Cole-Cole plots under 1000 Oe for **2-Dy**. Solid lines are the fits by the generalized Debye model with the best-fit values of the parameters listed in Table S4.

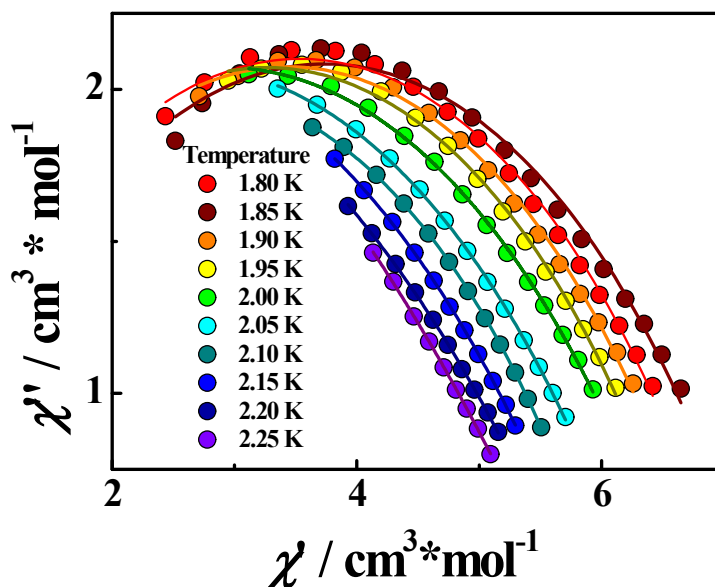

**Figure S12.** High frequency part of Cole-Cole plots under 1000 Oe for **4-Er**. Solid lines are the fits by the generalized Debye model with the best-fit values of the parameters listed in Table S4.

**Table S1.** Calculated crystal-field parameters  $B_{kq}$  (in  $\text{cm}^{-1}$ ) for **1-Tb**, **2-Dy**, **3-Ho** and **4-Er** complexes. Real (Re) and imaginary (Im) parts of complex  $B_{kq}$  parameters are indicated<sup>(a)</sup>

|                              |     | <b>1-Tb</b> |             | <b>2-Dy</b> |             | <b>3-Ho</b> |             | <b>4-Er</b> |             |
|------------------------------|-----|-------------|-------------|-------------|-------------|-------------|-------------|-------------|-------------|
| $k$                          | $q$ | Re $B_{kq}$ | Im $B_{kq}$ |
| 2                            | 0   | 360         | 0           | 77          | 0           | 175         | 0           | 120         | 0           |
| 2                            | 1   | 1           | -26         | 67          | -33         | -29         | 76          | -75         | 56          |
| 2                            | 2   | -100        | 107         | 232         | -15         | 122         | -15         | 216         | -36         |
| 4                            | 0   | 302         | 0           | 320         | 0           | 352         | 0           | 354         | 0           |
| 4                            | 1   | 121         | 12          | -58         | 104         | -41         | 178         | -58         | 108         |
| 4                            | 2   | -16         | 78          | 61          | -51         | 71          | -35         | 69          | -56         |
| 4                            | 3   | -7          | 601         | 299         | 544         | 275         | 447         | 328         | 573         |
| 4                            | 4   | -9          | 356         | -372        | 65          | -307        | 59          | -405        | 67          |
| 6                            | 0   | 172         | 0           | 184         | 0           | 244         | 0           | 203         | 0           |
| 6                            | 1   | 149         | 17          | -66         | 146         | -94         | 99          | -78         | 163         |
| 6                            | 2   | 72          | 180         | 58          | -196        | 49          | -279        | 64          | -220        |
| 6                            | 3   | 131         | 156         | 203         | 76          | 266         | 158         | 228         | 99          |
| 6                            | 4   | 4           | -90         | 93          | -6          | 92          | 14          | 99          | -9          |
| 6                            | 5   | 69          | 297         | -24         | -344        | -17         | -581        | -20         | -401        |
| 6                            | 6   | -248        | -241        | -339        | 92          | -580        | 124         | -342        | 105         |
| $S^{(b)}$ , $\text{cm}^{-1}$ |     | 468         |             | 466         |             | 512         |             | 501         |             |

<sup>(a)</sup> The  $B_{kq}$  CF parameters are obtained from the superposition-model CF calculations with the follows sets of intrinsic  $b_k$  parameters, (1) for **2-Dy** and **4-Er**:  $b_2 = 1000$ ,  $b_4 = 420$ ,  $b_6 = 270 \text{ cm}^{-1}$  (at  $R_0 = 2.45 \text{ \AA}$ ), for O and N ligand atoms, (2) for **1-Tb**:  $b_2 = 700$ ,  $b_4 = 420$ ,  $b_6 = 270 \text{ cm}^{-1}$  (at  $R_0 = 2.45 \text{ \AA}$ ) for O, and  $b_2 = 400$ ,  $b_4 = 420$ ,  $b_6 = 270 \text{ cm}^{-1}$  (at  $R_0 = 2.45 \text{ \AA}$ ) for N; some fine extra correction was applied for the  $k=2$   $B_{kq}$  parameters, (3) for **3-Ho**:  $b_2 = 600$ ,  $b_4 = 380$ ,  $b_6 = 330 \text{ cm}^{-1}$  (at  $R_0 = 2.45 \text{ \AA}$ ) for O, and  $b_2 = 400$ ,  $b_4 = 390$ ,  $b_6 = 340 \text{ cm}^{-1}$  (at  $R_0 = 2.55 \text{ \AA}$ ) for N. The  $t^k$  parameters are all fixes at  $t^2 = 5$ ,  $t^4 = 8$  and  $t^6 = 11$ .

<sup>(b)</sup>  $S$  criterion estimates the overall strength of the crystal-field potential of  $\text{Ln}^{3+}$  ions in terms of  $B_{kq}$

$$\text{parameters, } S = \left[ \frac{1}{3} \sum_{k=2,4,6} \left( \frac{1}{2k+1} \right) \left( B_{k0}^2 + 2 \sum_{k=2,4,6} (\text{Re} B_{kq}^2 + \text{Im} B_{kq}^2) \right) \right]^{1/2}, \text{ ref. [1S]}$$

**Table S2.** Real (Re) and imaginary (Im) parts of complex expansion coefficients  $C(M_J)$  of the  $|\text{}^6\text{H}_{15/2}, M_J\rangle$  composition of wave functions of the ground Kramers doublet  $\phi^\pm$  of  $\text{Dy}^{3+}$  ion in **2-Dy** complex

| $M_J$ | $\phi^+$ |        | $\phi^-$ |        |
|-------|----------|--------|----------|--------|
|       | Re       | Im     | Re       | Im     |
| -15/2 | -0.110   | -0.108 | 0.015    | 0.015  |
| -13/2 | 0.167    | 0.019  | 0.202    | 0.004  |
| -11/2 | -0.209   | -0.054 | -0.095   | 0.252  |
| -9/2  | 0.345    | -0.147 | 0.055    | -0.021 |
| -7/2  | -0.071   | 0.095  | -0.063   | 0.348  |
| -5/2  | 0.133    | -0.203 | -0.196   | 0.124  |
| -3/2  | 0.309    | 0.186  | 0.013    | 0.147  |
| -1/2  | -0.090   | -0.127 | -0.457   | 0.076  |
| 1/2   | 0.273    | 0.374  | -0.153   | 0.028  |
| 3/2   | 0.112    | -0.096 | -0.351   | -0.083 |
| 5/2   | 0.054    | 0.225  | -0.047   | 0.238  |
| 7/2   | 0.198    | -0.293 | -0.015   | 0.117  |
| 9/2   | -0.024   | -0.054 | 0.144    | 0.346  |
| 11/2  | 0.108    | -0.246 | 0.188    | 0.107  |
| 13/2  | -0.148   | -0.138 | 0.133    | 0.103  |
| 15/2  | 0.022    | 0      | 0.154    | 0      |

**Table S3.** Real (Re) and imaginary (Im) parts of complex expansion coefficients  $C(M_J)$  of the  $|^4H_{15/2}, M_J\rangle$  composition of wave functions of the ground Kramers doublet  $\varphi^\pm$  of  $\text{Er}^{3+}$  ion in **4-Er** complex

| $M_J$ | $\varphi^+$ |        | $\varphi^-$ |        |
|-------|-------------|--------|-------------|--------|
|       | Re          | Im     | Re          | Im     |
| -15/2 | 0.054       | -0.156 | -0.005      | 0.016  |
| -13/2 | -0.120      | -0.396 | 0.075       | 0.199  |
| -11/2 | 0.001       | 0.219  | 0.192       | 0.149  |
| -9/2  | 0.091       | 0.239  | -0.075      | -0.159 |
| -7/2  | -0.155      | 0.204  | -0.058      | -0.201 |
| -5/2  | 0.152       | -0.071 | -0.025      | -0.157 |
| -3/2  | 0.369       | -0.053 | -0.197      | 0.113  |
| -1/2  | -0.253      | 0.056  | -0.311      | 0.185  |
| 1/2   | -0.277      | 0.233  | 0.136       | -0.221 |
| 3/2   | 0.172       | -0.149 | 0.172       | -0.331 |
| 5/2   | 0.140       | 0.076  | -0.117      | 0.120  |
| 7/2   | -0.171      | -0.121 | -0.243      | 0.079  |
| 9/2   | 0.125       | 0.123  | 0.195       | 0.165  |
| 11/2  | 0.078       | 0.230  | -0.206      | -0.073 |
| 13/2  | -0.163      | -0.137 | -0.335      | -0.243 |
| 15/2  | 0.017       | 0      | 0.166       | 0      |

**Table S4.** Parameters for **2-Dy** and **4-Er** resulting from the analysis of *ac* magnetic susceptibility by generalized Debye model where  $\chi_S$  is the adiabatic susceptibility,  $\chi_T$  is the isothermal susceptibility and  $\alpha$  is the dispersion coefficient showing the distribution of the relaxation time.

| <b>2-Dy</b>   |                                  |                                  |          | <b>4-Er</b>   |                                  |                                  |          |
|---------------|----------------------------------|----------------------------------|----------|---------------|----------------------------------|----------------------------------|----------|
| $T, \text{K}$ | $\chi_S, \text{cm}^3/\text{mol}$ | $\chi_T, \text{cm}^3/\text{mol}$ | $\alpha$ | $T, \text{K}$ | $\chi_S, \text{cm}^3/\text{mol}$ | $\chi_T, \text{cm}^3/\text{mol}$ | $\alpha$ |
| 1.8           | 0.75                             | 6.25                             | 0.22     | 1.8           | 0                                | 7.45                             | 0.23     |
| 1.85          | 0.725                            | 5.925                            | 0.21     | 1.85          | 0                                | 7.23                             | 0.24     |
| 1.9           | 0.675                            | 5.75                             | 0.21     | 1.9           | 0                                | 7.08                             | 0.25     |
| 1.95          | 0.55                             | 5.575                            | 0.213    | 1.95          | 0                                | 6.95                             | 0.24     |
| 2             | 0.4475                           | 5.4075                           | 0.23     | 2             | 0                                | 6.85                             | 0.26     |
| 2.05          | 0.205                            | 5.355                            | 0.24     | 2.05          | 0                                | 6.53                             | 0.25     |
| 2.1           | 0.1025                           | 5.2025                           | 0.25     | 2.1           | 0                                | 6.25                             | 0.26     |
| 2.15          | 0.05                             | 5.05                             | 0.28     | 2.15          | 0                                | 6.15                             | 0.24     |
|               |                                  |                                  |          | 2.2           | 0                                | 6.09                             | 0.25     |
|               |                                  |                                  |          | 2.25          | 0                                | 6                                | 0.26     |

## References

(1S) N.C. Chang, J.B. Gruber, R.P. Leavitt, C.A. Morrison, *J. Chem. Phys.*, 1982, **78**, 3877 – 3889.
